# Supplementary material for: Identification of Plasmodium dipeptidyl aminopeptidase allosteric inhibitors by high throughput screening
Source: PubMed Central journal article supplement (PMC6919601; doi:10.1371/journal.pone.0226270), 2019-12-18
Supplement: pone.0226270.s007.pdf [file pone.0226270.s007.pdf]

| <b>S4 Table.</b> F-test results to statistically validate the chosen MOI model. |            |                |         |                 |            |                                  |         |                 |            |                |         |                 |
|---------------------------------------------------------------------------------|------------|----------------|---------|-----------------|------------|----------------------------------|---------|-----------------|------------|----------------|---------|-----------------|
| Compound                                                                        | DPAP1      |                |         |                 | CatC       |                                  |         |                 | FP3        |                |         |                 |
|                                                                                 | Model      | Null Hyp Model | p-value | Null Hyp Answer | Model      | Null Hyp Model                   | p-value | Null Hyp Answer | Model      | Null Hyp Model | p-value | Null Hyp Answer |
| SMDC170123                                                                      | P-M        | <b>P-C</b>     | 0.1     | Accept          | P-M        | <b>P-NC</b>                      | 0.3     | Accept          | <b>P-M</b> | P-U            | 0.006   | Reject          |
| SMDC170136                                                                      | P-M        | <b>P-C</b>     | 0.1     | Accept          | P-M        | <b>P-NC</b>                      | 0.7     | Accept          | P-M        | <b>P-U</b>     | 0.1     | Accept          |
| SMDC170156                                                                      |            |                |         |                 | P-M        | <b>P-NC</b>                      | 0.09    | Accept          |            |                |         |                 |
| SMDC178790                                                                      | P-M        | <b>P-C</b>     | 0.5     | Accept          |            |                                  |         |                 |            |                |         |                 |
| SMDC178801                                                                      | P-M        | <b>P-C</b>     | 0.5     | Accept          |            |                                  |         |                 | <b>P-M</b> | P-U            | 0.03    | Reject          |
| SMDC170123                                                                      | <b>P-M</b> | P-C            | 0.03    | Reject          |            |                                  |         |                 |            |                |         |                 |
| SMDC31843                                                                       | P-M        | <b>P-C</b>     | 0.1     | Accept          | P-M        | <b>P-M; <math>\beta=0</math></b> | N.C.    | Accept          | <b>UNC</b> | P-U            | N.C.    | Accept          |
| SMDC103222                                                                      | P-M        | <b>P-C</b>     | 0.7     | Accept          |            |                                  |         |                 | <b>UNC</b> | P-U            | N.C.    | Accept          |
| SMDC168313                                                                      | P-M        | <b>P-C</b>     | 0.5     | Accept          |            |                                  |         |                 |            |                |         |                 |
| SMDC106517                                                                      | <b>P-M</b> | P-C            | 0.005   | Reject          |            |                                  |         |                 |            |                |         |                 |
| SMDC153437A                                                                     | <b>P-M</b> | P-C            | 0.002   | Reject          | <b>P-M</b> | P-U                              | 0.01    | Reject          |            |                |         |                 |

The chosen inhibitor model after performing the F-test is highlighted in bold. The null hypothesis was rejected (i.e. the data were fitted to the model that has an additional parameter) if the p-value was below 0.05. Abbreviations of inhibition models: P-M, partial mixed; P-C, partial competitive; UNC, uncompetitive; and P-U, partial uncompetitive.
