# Supplementary material for: Identification of Plasmodium dipeptidyl aminopeptidase allosteric inhibitors by high throughput screening
Source: PubMed Central journal article supplement (PMC6919601; doi:10.1371/journal.pone.0226270), 2019-12-18
Supplement: pone.0226270.s008.pdf [file pone.0226270.s008.pdf]

**S5 Table.** Dependence of  $V_{\max,app}$  and  $K_{m,app}$  on inhibition parameters.

| Inhibition Model        | Equation in Table 3                                                                                                                                                                                                   | $V_{\max,app}$                                                                                                 | $K_{m,app}$                                                                     |
|-------------------------|-----------------------------------------------------------------------------------------------------------------------------------------------------------------------------------------------------------------------|----------------------------------------------------------------------------------------------------------------|---------------------------------------------------------------------------------|
| Competitive             | $v = \frac{V_{\max} \cdot [S]}{K_m \cdot \left(\frac{K_i + [I]}{K_i}\right) + [S]}$                                                                                                                                   | $V_{\max,app} = V_{\max}$                                                                                      | $K_{m,app} = K_m \left(1 + \frac{[I]}{K_i}\right)$                              |
| Un-competitive          | $v = \frac{V_{\max} \cdot [S]}{K_m + [S] \cdot \left(\frac{K_i + [I]}{K_i}\right)}$                                                                                                                                   | $V_{\max,app} = V_{\max} \cdot \left(\frac{K_i}{K_i + [I]}\right)$                                             | $K_{m,app} = K_m \cdot \left(\frac{K_i}{K_i + [I]}\right)$                      |
| Partial Competitive     | $v = \frac{V_{\max} \cdot [S]}{K_m \cdot \left(\frac{\alpha \cdot K_i + \alpha \cdot [I]}{\alpha \cdot K_i + [I]}\right) + [S]}$                                                                                      | $V_{\max,app} = V_{\max}$                                                                                      | $K_{m,app} = K_m \left(\frac{K_i + [I]}{K_i + \frac{[I]}{\alpha}}\right)$       |
| Partial Non-Competitive | $v = \frac{V_{\max} \cdot \left(\frac{K_i + \beta \cdot [I]}{K_i + [I]}\right) \cdot [S]}{K_m + [S]}$                                                                                                                 | $V_{\max,app} = V_{\max} \cdot \left(\frac{K_i + \beta \cdot [I]}{K_i + [I]}\right)$                           | $K_{m,app} = K_m$                                                               |
| Partial Un-competitive  | $v = \frac{V_{\max} \cdot [S]}{K_m + [S] \cdot \left(\frac{\alpha \cdot K_i + [I]}{\alpha \cdot K_i + \alpha \cdot [I]}\right)}$                                                                                      | $V_{\max,app} = V_{\max} \left(\frac{K_i + [I]}{K_i + \frac{[I]}{\alpha}}\right)$                              | $K_{m,app} = K_m \left(\frac{K_i + [I]}{K_i + \frac{[I]}{\alpha}}\right)$       |
| Partial Mixed           | $v = \frac{V_{\max} \cdot \left(\frac{\alpha \cdot K_i + \beta \cdot [I]}{\alpha \cdot K_i + [I]}\right) \cdot [S]}{K_m \cdot \left(\frac{\alpha \cdot K_i + \alpha \cdot [I]}{\alpha \cdot K_i + [I]}\right) + [S]}$ | $V_{\max,app} = V_{\max} \cdot \left(\frac{\alpha \cdot K_i + \beta \cdot [I]}{\alpha \cdot K_i + [I]}\right)$ | $K_{m,app} = K_m \cdot \left(\frac{K_i + [I]}{K_i + \frac{[I]}{\alpha}}\right)$ |
