# Supplementary material for: Identification of Plasmodium dipeptidyl aminopeptidase allosteric inhibitors by high throughput screening
Source: PLoS One. 2019 Dec 18;14(12):e0226270. doi: 10.1371/journal.pone.0226270 (PMC6919601; doi:10.1371/journal.pone.0226270)
Supplement: S3 Table — (XLSX) [file pone.0226270.s006.xlsx]

## Sheet: Sheet1
	S3 Table. DOPTACN compounds present in the HTS library.
	Compound ID (SMDC ID)	Lot ID	SMILES	Vendor	Vendor ID	Assay Plate	Assay Well	% Inhibition @ 10 uM	Fluorescent Intensity (RFU)	DPAP Primary hit (Hit = 1)
	170124	1	CSc1ccc(cc1)C2CC(=O)N3CN(C)CSC3=C2C#N	ChemDiv	C499-0456	03733CD	E07	75	432495712	1
	178781	1	CC(N1CSC2=C(C#N)C(CC(=O)N2C1)c3ccc(Cl)cc3)c4ccccc4	ChemDiv	D006-0201	03760CD	G21	73	452210592	1
	170126	1	CN1CSC2=C(C#N)C(CC(=O)N2C1)c3cccc(OCc4ccccc4)c3	ChemDiv	C499-0958	03733CD	E11	71	497573376	1
	178842	1	CCOc1ccc(cc1)C2CC(=O)N3CN(CCc4ccccc4)CSC3=C2C#N	ChemDiv	D006-0300	03760CD	E04	71	485400352	1
	178833	1	CC(N1CSC2=C(C#N)C(CC(=O)N2C1)c3cccs3)c4ccccc4	ChemDiv	D006-0378	03760CD	C06	68	538053952	1
	170136	1	O=C1CC(C(=C2SCN(Cc3occc3)CN12)C#N)c4cccc(OCc5ccccc5)c4	ChemDiv	C499-0976	03733CD	G11	67	572191424	1
	170103	1	CCc1ccc(cc1)C2CC(=O)N3CN(CSC3=C2C#N)C4CCCCC4	ChemDiv	C499-0205	03733CD	A05	65	610954304	1
	178761	1	Cc1ccc(cc1)C2CC(=O)N3CN(CCc4ccccc4)CSC3=C2C#N	ChemDiv	D006-0166	03760CD	C21	64	603520640	1
	170125	1	COc1ccc(Br)cc1C2CC(=O)N3CN(Cc4occc4)CSC3=C2C#N	ChemDiv	C499-0898	03733CD	E09	61	677736576	1
	170155	1	COc1ccc(Br)cc1C2CC(=O)N3CN(Cc4ccccc4)CSC3=C2C#N	ChemDiv	C499-0916	03733CD	K09	61	673137920	1
	178832	1	CCOc1ccc(cc1)C2CC(=O)N3CN(CCO)CSC3=C2C#N	ChemDiv	D006-0299	03760CD	C04	61	651584192	1
	170135	1	COc1ccc(Br)cc1C2CC(=O)N3CN(CSC3=C2C#N)C4CCCCC4	ChemDiv	C499-0907	03733CD	G09	60	682985856	1
	170145	1	COc1ccc(Br)cc1C2CC(=O)N3CN(C)CSC3=C2C#N	ChemDiv	C499-0915	03733CD	I09	59	706704896	1
	170123	1	CN1CSC2=C(C#N)C(CC(=O)N2C1)c3ccccc3Cl	ChemDiv	C499-0240	03733CD	E05	57	743795264	1
	170146	1	COc1cc(cc(Br)c1O)C2CC(=O)N3CN(Cc4ccccc4)CSC3=C2C#N	ChemDiv	C499-0983	03733CD	I11	57	738260032	1
	178790	1	COc1cccc(c1)C2CC(=O)N3CN(CCc4sccc4C)CSC3=C2C#N	ChemDiv	D006-0131	03760CD	I19	57	722137920	1
	178821	1	CCOc1ccc(cc1)C2CC(=O)N3CN(Cc4cccnc4)CSC3=C2C#N	ChemDiv	D006-0274	03760CD	O21	56	738260032	1
	178771	1	Clc1ccc(cc1)C2CC(=O)N3CN(CSC3=C2C#N)C4CCCC4	ChemDiv	D006-0192	03760CD	E21	55	749414208	1
	178791	1	CC(C)CCN1CSC2=C(C#N)C(CC(=O)N2C1)c3ccc(Cl)cc3	ChemDiv	D006-0203	03760CD	I21	55	760910400	1
	178852	1	Fc1ccc(cc1)C2CC(=O)N3CN(Cc4cccnc4)CSC3=C2C#N	ChemDiv	D006-0312	03760CD	G04	55	749414208	1
	170156	1	O=C1CC(C(=C2SCN(CN12)C3CCCCC3)C#N)c4cccc5ccccc45	ChemDiv	C499-1006	03733CD	K11	54	792045504	1
	178822	1	CCOc1ccc(cc1)C2CC(=O)N3CN(CSC3=C2C#N)C(C)c4ccccc4	ChemDiv	D006-0286	03760CD	A04	53	784994624	1
	170166	1	O=C1CC(C(=C2SCN(Cc3ccccc3)CN12)C#N)c4cccc5ccccc45	ChemDiv	C499-1010	03733CD	M11	52	831025728	1
	178801	1	Cc1ccsc1CCN2CSC3=C(C#N)C(CC(=O)N3C2)c4ccc(Cl)cc4	ChemDiv	D006-0226	03760CD	K21	52	810653248	1
	178872	1	Fc1ccc(cc1)C2CC(=O)N3CN(CCc4ccccc4)CSC3=C2C#N	ChemDiv	D006-0343	03760CD	K04	52	810653248	1
	178823	1	COc1ccc(CN2CSC3=C(C#N)C(CC(=O)N3C2)c4cccs4)cc1	ChemDiv	D006-0372	03760CD	A06	51	824122112	1
	178862	1	Fc1ccc(cc1)C2CC(=O)N3CN(CCN4CCOCC4)CSC3=C2C#N	ChemDiv	D006-0340	03760CD	I04	50	845185920	1
	170162	1	CCOc1ccc(cc1)C2CC(=O)N3CN(Cc4ccccc4)CSC3=C2C#N	ChemDiv	C499-0187	03733CD	M03	49	882791488	0
	170104	1	CCOc1ccc(cc1OC)C2CC(=O)N3CN(C)CSC3=C2C#N	ChemDiv	C499-0348	03733CD	A07	48	898787712	0
	178882	1	O=C1CC(C(=C2SCN(CN12)C3CCCC3)C#N)c4cccs4	ChemDiv	D006-0367	03760CD	M04	48	867354752	0
	178892	1	O=C1CC(C(=C2SCN(Cc3occc3)CN12)C#N)c4cccs4	ChemDiv	D006-0370	03760CD	O04	48	875005056	0
	170152	1	CCOc1ccc(cc1)C2CC(=O)N3CN(CSC3=C2C#N)C4CCCCC4	ChemDiv	C499-0178	03733CD	K03	47	915374400	0
	178780	1	COc1ccc(cc1OC)C2CC(=O)N3CN(CCC(C)C)CSC3=C2C#N	ChemDiv	D006-0074	03760CD	G19	47	890717824	0
	170176	1	O=C1CC(C(=C2SCN(Cc3occc3)CN12)C#N)c4cccc5ccccc45	ChemDiv	C499-1011	03733CD	O11	46	932584704	0
	178811	1	COc1ccc(cc1)C2CC(=O)N3CN(Cc4cccnc4)CSC3=C2C#N	ChemDiv	D006-0229	03760CD	M21	46	898787712	0
	178751	1	CC(C)CCN1CSC2=C(C#N)C(CC(=O)N2C1)c3ccc(C)cc3	ChemDiv	D006-0153	03760CD	A21	44	941434880	0
	178800	1	Cc1ccc(cc1)C2CC(=O)N3CN(Cc4cccnc4)CSC3=C2C#N	ChemDiv	D006-0135	03760CD	K19	44	941434880	0
	178810	1	COc1ccc(CN2CSC3=C(C#N)C(CC(=O)N3C2)c4ccc(C)cc4)cc1	ChemDiv	D006-0145	03760CD	M19	44	941434880	0
	170115	1	CN1CSC2=C(C#N)C(CC(=O)N2C1)c3ccc(Br)cc3	ChemDiv	C499-0861	03733CD	C09	43	969022720	0
	170142	1	CCOc1ccc(cc1)C2CC(=O)N3CN(Cc4occc4)CSC3=C2C#N	ChemDiv	C499-0169	03733CD	I03	43	969022720	0
	178843	1	O=C1CC(C(=C2SCN(CCc3ccccc3)CN12)C#N)c4cccs4	ChemDiv	D006-0394	03760CD	E06	43	960810560	0
	170081	1	Clc1ccc(cc1)C2CC(=O)N3CN(Cc4occc4)CSC3=C2C#N	ChemDiv	C499-0034	03732CD	L22	42	988330752	0
	170091	1	Clc1ccc(cc1)C2CC(=O)N3CN(Cc4ccccc4)CSC3=C2C#N	ChemDiv	C499-0052	03732CD	N22	42	988330752	0
	170105	1	O=C1CC(C(=C2SCN(Cc3ccccc3)CN12)C#N)c4cccs4	ChemDiv	C499-0835	03733CD	A09	41	1018779904	0
	170113	1	CCc1ccc(cc1)C2CC(=O)N3CN(Cc4ccccc4)CSC3=C2C#N	ChemDiv	C499-0214	03733CD	C05	39	1040143680	0
	170132	1	Fc1ccccc1C2CC(=O)N3CN(CSC3=C2C#N)C4CCCCC4	ChemDiv	C499-0151	03733CD	G03	38	1063846592	0
	170175	1	COc1ccc2ccccc2c1C3CC(=O)N4CN(C)CSC4=C3C#N	ChemDiv	C499-0920	03733CD	O09	37	1085676544	0
	170106	1	COc1ccc2ccccc2c1C3CC(=O)N4CN(Cc5ccccc5)CSC4=C3C#N	ChemDiv	C499-0932	03733CD	A11	36	1097689728	0
	170172	1	CCc1ccc(cc1)C2CC(=O)N3CN(Cc4occc4)CSC3=C2C#N	ChemDiv	C499-0196	03733CD	O03	34	1135378560	0
	170114	1	CN1CSC2=C(C#N)C(CC(=O)N2C1)c3ccccc3	ChemDiv	C499-0429	03733CD	C07	33	1148523264	0
	170154	1	COc1ccc(C2CC(=O)N3CN(Cc4ccccc4)CSC3=C2C#N)c(OC)c1	ChemDiv	C499-0727	03733CD	K07	32	1161975936	0
	170122	1	Cc1ccccc1C2CC(=O)N3CN(Cc4ccccc4)CSC3=C2C#N	ChemDiv	C499-0106	03733CD	E03	31	1175747584	0
	170165	1	COc1ccc2ccccc2c1C3CC(=O)N4CN(Cc5occc5)CSC4=C3C#N	ChemDiv	C499-0919	03733CD	M09	31	1175747584	0
	178760	1	COc1ccc(cc1OC)C2CC(=O)N3CN(CCCc4ccccc4)CSC3=C2C#N	ChemDiv	D006-0070	03760CD	C19	31	1161975936	0
	178770	1	COc1ccc(cc1OC)C2CC(=O)N3CN(CSC3=C2C#N)C(C)c4ccccc4	ChemDiv	D006-0073	03760CD	E19	28	1204293760	0
	170116	1	COc1ccc2ccccc2c1C3CC(=O)N4CN(CSC4=C3C#N)C5CCCCC5	ChemDiv	C499-0938	03733CD	C11	27	1249810304	0
	170101	1	Cc1ccc(cc1)C2CC(=O)N3CN(CSC3=C2C#N)C4CCCCC4	ChemDiv	C499-0070	03732CD	P22	26	1265756928	0
	170102	1	Cc1ccccc1C2CC(=O)N3CN(Cc4occc4)CSC3=C2C#N	ChemDiv	C499-0088	03733CD	A03	26	1265756928	0
	170112	1	Cc1ccccc1C2CC(=O)N3CN(CSC3=C2C#N)C4CCCCC4	ChemDiv	C499-0097	03733CD	C03	24	1298902784	0
	170144	1	COc1cccc(C2CC(=O)N3CN(CSC3=C2C#N)C4CCCCC4)c1OC	ChemDiv	C499-0583	03733CD	I07	22	1336076800	0
	170173	1	CCOc1cc(ccc1O)C2CC(=O)N3CN(Cc4ccccc4)CSC3=C2C#N	ChemDiv	C499-0322	03733CD	O05	20	1370690048	0
	170134	1	COc1cccc(C2CC(=O)N3CN(Cc4occc4)CSC3=C2C#N)c1OC	ChemDiv	C499-0574	03733CD	G07	19	1389894144	0
	170153	1	COc1cc(ccc1O)C2CC(=O)N3CN(Cc4occc4)CSC3=C2C#N	ChemDiv	C499-0277	03733CD	K05	18	1409644032	0
	178820	1	CC(N1CSC2=C(C#N)C(CC(=O)N2C1)c3ccc(C)cc3)c4ccccc4	ChemDiv	D006-0151	03760CD	O19	11	1494594432	0
	170143	1	COc1ccc(OC)c(c1)C2CC(=O)N3CN(CSC3=C2C#N)C4CCCCC4	ChemDiv	C499-0259	03733CD	I05	10	1541028352	0
	170071	1	COc1ccc(cc1OC)C2CC(=O)N3CN(Cc4ccccc4)CSC3=C2C#N	ChemDiv	C499-0025	03732CD	J22	7	1590440064	0
	170133	1	COc1ccc(OC)c(c1)C2CC(=O)N3CN(Cc4occc4)CSC3=C2C#N	ChemDiv	C499-0250	03733CD	G05	7	1590440064	0
	170174	1	COc1cc(cc(OC)c1OC)C2CC(=O)N3CN(C)CSC3=C2C#N	ChemDiv	C499-0753	03733CD	O07	4	1643125504	0
	170164	1	COc1cc(cc(OC)c1OC)C2CC(=O)N3CN(CSC3=C2C#N)C4CCCCC4	ChemDiv	C499-0745	03733CD	M07	2	1670799104	0
	170163	1	COc1cc(ccc1O)C2CC(=O)N3CN(CSC3=C2C#N)C4CCCCC4	ChemDiv	C499-0286	03733CD	M05	-1	1729040512	0
